# Supplementary material for: Host and Microbe Scale Processes Jointly Shape Spatial Variation in Aphaenogaster (Hymenoptera: Formicidae)associated Wolbachia
Source: Research Square preprint supplement (doi:10.21203/rs.3.rs-8515672/v1), 2026-01-29
Supplement: Supplementary file 1 [file a70d50d53680db25accd805e.docx]

**Supplemental Information I: Additional Methods**

*Ant Collection*

To collect ants from each quadrat of litter we scraped the leaf litter and top ~1 cm of soil from each quadrat and sifted it using a litter sieve to separate larger debris from fine litter and arthropods. We sifted until no small debris was left in the top aspect of the sifter and then placed all collected fine litter in a cotton bag along with a unique identifier tag. Bags were tied at the top to prevent any arthropods from escaping and were kept moist until they could be returned to our lab for processing (typically 3-5 days). To extract litter arthropods, samples were hung in a temperature-controlled laboratory at 20°C using self-assembled Winkler extractors43 for 12 days. Winkler extractors were shaken 2 days after initial hanging to encourage arthropod movement. Collected ants were stored in 100% ethanol until identification. Ant sampling was conducted in GSMNP under permit number GRSM-2020-SCI-2463.

*Ant Identification*

DAM and BC identified collected ants to the genus level using the key found in Ants of North America: A Guide to the Genera. *A. rudis* complex ants were then identified to species by BC by using a species complex key.44 Following identification, ants were kept frozen at -80°C in 1.5mL tubes filled with 100% ethanol until they could be characterized genetically through sequencing of the mitochondrial Cytochrome Oxidase I (COI), and nuclear carbomoylphosphate synthase (CAD) genes (see below). These loci contain phylogenetically informative nucleotide positions previously used for *Aphaenogaster* species delimitation and represent one mitochondrial (mtDNA) and one nuclear (nuDNA) marker respectively.45–47

*Microbial ASV Taxonomic Assignment and Subsequent Dataset Manipulation*

FASTQ files obtained through sequencing (see Main Text) were analyzed using a custom Qiime254 pipeline (see Github repo). We then filtered and processed reads using DADA255 with default trim and length settings changed to: --p-trim-left-f 19, --p-trim-left-r 20, --p-trunc-len-f 225, --p-trunc-len-r 225. We grouped sequenced reads into amplicon sequence variants (ASVs). A phylogenetic tree of our sequenced reads was created using the Qiime2 *align-to-tree-mafft-fasttree* function. Next, we trained a Naïve bayes classifier specific to our primer set using the *feature-classifier* Qiime2 function. Finally, ASVs were taxonomically classified using the Silva 99% similarity database and outputted as BIOM files for subsequent manipulation in R (version 4.2.1),primarily using functions from the *phyloseq* package (version 1.50.0).56

For full microbiota analyses, we first removed all sequences which could not be classified to phylum, as well as all mitochondrial and chloroplast sequences. This left only bacterial and archaeal amplicon sequence variants (ASVs). In addition, we removed potential contaminants by subtracting the maximum number of reads of each ASV found in any of our 19 sequencing blanks. Following this cleaning step, we removed all microbiota samples with a final read depth less than 20,000 reads, considering these sequencing failures. We then rarified to the number of reads in the lowest remaining sample (22,533 reads per sample). This left a total of 62 samples. We used all 62 of these samples for analyses involving only microbiota. For analyses that paired microbiota and COI/CAD, we only used samples for which both host and microbiota data were available (see Main Text).

Because we normalized library size across samples, and because endosymbionts, particularly *Wolbachia* (see Main Text) can dominate samples where they occur, we repeated all of our microbiota analyses removing ASVs mapping to dominant endosymbiotic genera (*Wolbachia,* *Spiroplasma*, *Entomoplasma* and *Sulcia*). Endosymbiont reads were removed from the full microbiota dataset prior to rarefication and all microbiota samples were then rarified to a final read depth of 10,000. Again, we used all available microbiota samples for microbiota analyses. For analyses that paired microbiota and COI/CAD, we only used samples for which both host and microbiota data were available.

*Wolbachia*

For both haplotype maps and ancestral state reconstructions (see SI III), we set the *Wolbachia* ASVs as ‘present’ if they comprised more than 0.5% of reads on an animal and ‘absent’ otherwise. We used a threshold of 0.5%, rather than 0%, because most samples had a small handful of *Wolbachia* reads from one or more of the three dominant *Wolbachia* strains. These reads could represent cross-contamination that was not removed during our cleaning steps (see above) or true presences at very low abundance. Regardless, there was a clear distinction between samples with only a few reads from dominant *Wolbachia* strains and samples with a large number of reads from dominant *Wolbachia* strains (see the ‘elbows’ in SI III Figure S3.4). A threshold of 0.5% was selected because it separated the low versus high read samples for all three *Wolbachia* strains. Importantly, even if low read samples represent true presences, and not contamination, large differences in *Wolbachia* loads can lead to cytoplasmic incompatibility (CI) if a strain is too rare in females and their eggs to rescue sperm modification by high density males.57

Haplotype Networks: We constructed haplotype networks using the Templeton, Crandall, and Sing (TCS) network66 method in the software PopART. For analysis of COI sequences, we used raw sequences, masking sequences with missing data and removing samples containing significantly more undefined states based on PopART recommendations. For analysis of CAD sequences, masking missing data resulted in all sequences being identical. Therefore, we first identified consensus sequences for green and yellow clade ants and then used these, along with sequences for basal ants, as input into PopART. This means that the PopART CAD tree, unlike the PopART COI tree, is constrained to be identical to the cladal structure in our phylogeny. We colored nodes in the haplotype networks based on the proportion of ants carrying different combinations of each of the three dominant *Wolbachia* ASVs.

Ancestral state reconstructions (ASRs): We performed ancestral state reconstructions (ASRs) for host environment using the PC1 environmental variable value for all extant ant samples. ASRs were generated using the *fastAnc* function from the *phytools* package (v. 2.3.0). We also performed ancestral state reconstruction for host carriage of each of the three dominant *Wolbachia* strains. This was done using the *ace* function from the *ape* package. Note that, for *Wolbachia* strains, we intend ASRs to be used to identify time of acquisition/loss of *Wolbachia* ASVs, and do not intend to imply any type of coevolution in our system.

**Supplemental Information II: Additional Host Analyses**

**Figure S2.1** Tanglegram showing high discordance in *A. rudis* complex phylogenetic tree reconstructions based on mitochondrial (left, COI) and nuclear (right, CAD) genes. Colors of the tanglegram lines are based on an east (orange) to west (purple) color scheme. Unpaired samples indicate that sequencing failed for either the COI or CAD gene. The red star marks the node that distinguishes the 30 most basal ants from the outgroup (*A. umphreyi*)in the COI tree, while the blue and purple stars mark the nodes that distinguish the purple and blue clades from both each other and the subtending ‘red’ clade ants. The yellow and green stars mark the nodes that separates the yellow and green clades from each other and from the 3 basal ants and outgroup (*A. umphreyi*) in the CAD tree. Morphological identification is indicated in the sample name (CARO: *A. carolinensis*, FULVA: *A. fulva*, PICEA: *A. picea*, RUDIS: *A. rudis*, TENN: *A. tennesseensis*).

**Figure S2.2** (A-C)Tanglegrams showing how COI genes of red (A), blue (B) and purple (C) clade ants partition between the yellow and green CAD clades. (D) CO1 phylogenetic tree mapped to 14 sites of origin across 81 ants in GSMNP. The node unassociated with a GSMNP location is the outgroup, *A. umphreyi*. Lines are colored based on whether the ant is part of the red mitochondrial clade with the green nuclear clade nuclear (red), the blue mitochondrial clade with the yellow nuclear clade (blue), the red mitochondrial clade with the yellow nuclear clade (orange) the blue mitochondrial clade with the green nuclear clade (cyan) or some other combination (e.g., purple mitochondrial clade, basal nuclear ‘clade’).

**Table S2.1** Number of ants with blue and red COI genes and green and yellow CAD genes.

|  | Green | Yellow |
| --- | --- | --- |
| Blue | 9 | 29 |
| Red | 17 | 8 |

Table S2.1 shows the number of ants with blue and red COI genes and green and yellow CAD genes. Blue and red clade ants differ significantly in their respective frequencies of green versus yellow CAD genes (Fisher’s exact test: *p-*value = 0.0006743).

**Figure S2.3** Mantel correlograms for genetic distance based on the COI consensus tree, regressed against spatial distance (A,B) and environmental distance (C,D) and assessed with Spearman’s rank correlation (A,C) and Pearson’s correlation (B,D). *p-*values shown on each panel reflect the significance of the corresponding Mantel tests.

**Figure S2.4** Mantel correlograms for genetic distance based on the CAD consensus tree, regressed against spatial distance (A,B) and environmental distance (C,D) and assessed with Spearman’s rank correlation (A,C) and Pearson’s correlation (B,D). *p-*values shown on each panel reflect the significance of the corresponding Mantel tests.

*Distance-based Redundancy Analysis*

To assess the relative contributions of spatial versus environmental factors on phylogenetic distance, we used distance-based redundancy analysis (dbRDA). Briefly, we identified distance-based Moran’s eigenvector maps (MEMs) using the *dbmem* function from the *adespatial* package (version 0.3-24) to identify all MEMs corresponding to positive autocorrelation (COI: 7 MEMs, CAD: 6 MEMs). We then used these, along with our four environmental variables, as input into a dbRDA. dbRDA was performed using the *dbrda* function from the *vegan* package, regressing the phylogenetic distance matrix against MEMs and environmental variables. We then used the *vif* function from the *car* package (version 3.1-3) to sequentially remove variables with the largest variance inflation factor, until all VIF values were <3.94 For both COI and CAD, all MEMs were retained, along with minimum soil temperature. We then ran a final dbRDA on the selected set of variables and tested for significance using the *anova.cca* function from the *vegan* package. Similar to Mantel tests, the final dbRDA for COI was highly significant (F = 3.3195, DF = 8, p-value: 0.002) whereas the final dbRDA for CAD was not (F: 1.0226, DF = 7, p-value: 0.443). Finally, we performed variance partitioning on our model, using all MEMs as our spatial variables and minimum soil temperature as our environmental variable. Variance partioning was performed using the *varpart* function from the *vegan* package. For the COI tree, spatial and spatial+environmental effects explained 20% of the variance. For the CAD tree, environmental effects explained a mere 1% of the variance, with most variance being unexplained (see Figure S2.3)

**Figure S2.5** Variance partitioning of spatial and environmental factors as explanatory variables in a dbRDA for COI phylogenetic distances (A) and CAD phylogenetic distances (B).

**Figure S2.6** Environmental ancestral trait reconstruction on the COI (A) and CAD (B) trees based on the PC1 environmental axis (see ‘Methods’). Loadings of the four environmental variables onto the conglomerate environmental axis are below the phylogenetic trees.

**Supplemental Information III: Additional Microbial Analyses**

*Overall microbiota*

**Figure S3.1** Microbial taxon barplots for *A. rudis* complex ant microbiota with (A) and without (B) dominant endosymbiont genera (*Wolbachia*, *Spiroplasma*, *Entomoplasma*, *Sulcia*). Samples are separated according to COI host clade and colored based on dominant phyla (Planctomycetota: blue, Bacteroidota: brown, Actinobacteriota: orange, Firmicutes: purple, Proteobacteria: green, Other: grey) and genera. Note that several samples in (B) were dropped due to low reads following removal of endosymbionts.

**Figure S3.2** Microbial taxon barplots for *A. rudis* complex ant microbiota with (A) and without (B) dominant endosymbiont genera (*Wolbachia*, *Spiroplasma*, *Entomoplasma*, *Sulcia*). Samples are separated according to CAD host clade and colored based on dominant phyla (Planctomycetota: blue, Bacteroidota: brown, Actinobacteriota: orange, Firmicutes: purple, Proteobacteria: green, Other: grey) and genera. Note that several samples in (B) were dropped due to low reads following removal of endosymbionts.

*Wolbachia*

**Figure S3.3** Identification of *Wolbachia* supergroups. Reference *Wolbachia* strains are labelled with a ‘w’, followed by the supergroup and NCBI accession number. All other strains are from the current study, with the three dominant *Wolbachia* ASVs marked by black stars. *Ehrlichia chaffeensis* is used as an outgroup (black). Supergroups are colored as follows: *A*: red, *B*: purple, *C*: yellow, *D*: green, *F*: blue, *H*: orange, *J*: grey.

**Figure S3.4** Read counts for each of the three dominant *Wolbachia* ASVs, ranked from lowest to highest and with the 0.5% thresholds marked using a dashed red line.

Figure S3.4shows how the thresholds for determining *Wolbachia*. More specifically, 0.5% marks an ‘elbow’ that is largely consistent across the *Wolbachia*.

Variance Partitioning: Like host genetic structuring (see Figure S2.5), we used variance partitioning to identify spatial versus environmental drivers of spatial variation in *Wolbachia*. First, we calculate a *Wolbachia* distance matrix based on the absolute difference in *Wolbachia* relative abundance between each pair of ants. Second, we used the Haversine formula to calculate the great circle distance between all ant capture locations based on jittered (see above) longitude and latitude. This was implemented using the *distm* function from the *geosphere* package (v. 1.5-20). We then used the resulting distance matrix to calculate distance-based Moran’s eigenvector maps using the *dbmem* function from the *adespatial* package. Next, we used the *varpart* function from the *vegan* package, inputting the *Wolbachia* distance matrix as the response variable and the distance-based Moran’s eigenvector maps and each ant’s value along the PC1 environmental axis as explanatory variables.

**Figure S3.5** Variance partitioning of spatial and environmental factors as explanatory variables in a dbRDA for *Wolbachia* relative abundance.

**Figure S3.6 (A)** Phylogeny of the 32 *Wolbachia* ASVs in our study, rooted with an uncultured Rickettsiaceae ASV as the outgroup (black). *Wolbachia* tips are colored according to their overall abundance across all ant samples (red: high, white: low). Circular tips are used for non-focal ASVs and diamond tips are used for focal ASVs. Note that the color scheme is logarithmic; the total reads assigned to the three focal strains were wArudF1: 40,033, wArudA1: 21,543 and wArudA2: 186,262. The total reads assigned to the next most abundant *Wolbachia* ASV was 153.Haplotype map for COI **(B)** and CAD **(C)** showing carriage of the three dominant *Wolbachia* ASVs: all three *Wolbachia* ASVs (red), wArudF1 and wArudA1 (dark pink), only wArudA2 (light pink), no *Wolbachia* (white). Black is used for animals for which we had COI or CAD sequences but where the HA microbiota did not successfully extract and/or amplify. (See SI III Figure S3.3 for *Wolbachia* ASRs and a haplotype map for the CAD gene tree).

**Figure S3.7** Ancestral state reconstructions for *Wolbachia* wArudF1 **(A)**, wArudA1 **(B)** and wArudA2 **(C)** based on the COI gene tree.

**Figure S3.8** Ancestral state reconstructions for *Wolbachia* wArudF1 **(A)**, wArudA1 **(B)** and wArudA2 **(C)** based on the CAD gene tree.

**Figure S3.9** Generalized linear models of *Wolbachia* relative abundance as a function of our conglomerate environmental variable (see Methods) for blue clade ants including the outlier at Ramsey Cascade. Sites are denoted as follows: Cades Cove (closed squares), Twin Creeks (closed downward triangles), Oconaluftee (closed diamond), Trillium Gap (star), Snake Den (open upward triangle), Albright Grove (open downward triangle), Cataloochee (closed upward blue triangles), Purchase Knob (open squares), Brush Mountain Myrtle (closed blue circles), Brush Mountain (open circles), Ramsey Casdae (open diamond).

**Figure S3.10** CO1 phylogenetic tree mapped to 14 sites of origin across 81 ants in GSMNP. (A) Lines are colored based on *Wolbachia* carriage as follows: wArudF1+wArudA1+wArudA2 (red), wArudA1+wArudA2 (bright pink), wArudF1+wArudA1 (dark pink), wArudA2 (pink), and no *Wolbachia* (white). (B) Lines are colored based on COI clade. Note that in (B), to facilitate comparison with the *Wolbachia* map, we only include COI sequences for which we have paired HA microbiota sequences.
